# Supplementary material for: Low Immunogenicity of Neural Progenitor Cells Differentiated from Induced Pluripotent Stem Cells Derived from Less Immunogenic Somatic Cells
Source: PLOS journal article supplement (doi:10.1371/journal.pone.0069617), 2013-07-26
Supplement: S5 (10.1371/journal.pone.0069617.s005) [file journal.pone.0069617.s005]

Table S2. Percentage of perforin expression in various immune effector cells in PBMCs co-culture system

| No.     | CD3+CD8- T cells |         |            |       | CD3+CD8+ T cells |         |            |       | CD3-CD56+ NK |         |          |       |
|---------|------------------|---------|------------|-------|------------------|---------|------------|-------|--------------|---------|----------|-------|
|         | PBMCs only*      | SF-NPCs | UMC-NPCs # | PHA   | PBMCs only*      | SF-NPCs | UMC-NPCs # | PHA   | PBMCs only   | SF-NPCs | UMC-NPCs | PHA   |
| 1       | 3.65             | 5.67    | 5.45       | 7.07  | 3.60             | 6.23    | 4.12       | 7.90  | 20.70        | 25.60   | 19.30    | 73.20 |
| 2       | 3.91             | 6.38    | 6.00       | 9.06  | 3.10             | 4.29    | 3.37       | 11.10 | 4.68         | 6.43    | 5.58     | 9.31  |
| 3       | 3.00             | 5.87    | 3.03       | 6.04  | 4.60             | 6.74    | 5.80       | 7.30  | 0.01         | 4.55    | 3.65     | 5.84  |
| 4       | 1.14             | 2.50    | 0.91       | 7.50  | 3.00             | 4.70    | 3.60       | 9.23  | 3.57         | 6.82    | 3.59     | 9.50  |
| 5       | 1.01             | 9.40    | 1.86       | 3.75  | 3.50             | 10.40   | 3.90       | 10.00 | 0.20         | 0.89    | 0.22     | 0.63  |
| 6       | 1.36             | 4.04    | 1.73       | 4.80  | 4.90             | 5.60    | 4.40       | 10.00 | 0.10         | 0.75    | 0.46     | 0.80  |
| 7       | 0.56             | 1.10    | 0.91       | 1.40  | 0.47             | 1.37    | 1.34       | 1.70  | 2.68         | 4.76    | 6.74     | 8.22  |
| 8       | 3.67             | 5.30    | 4.21       | 5.61  | 0.74             | 4.00    | 2.99       | 4.04  | 2.71         | 0.58    | 0.56     | 7.83  |
| 9       | 4.11             | 5.00    | 3.89       | 7.07  | 2.18             | 5.89    | 4.19       | 4.68  | 4.92         | 12.20   | 4.18     | 17.10 |
| 10      | 1.61             | 1.52    | 0.90       | 2.84  | 1.28             | 2.78    | 1.17       | 2.71  | 11.40        | 13.00   | 18.00    | 18.30 |
| 11      | 2.00             | 1.87    | 1.11       | 4.01  | 0.90             | 1.61    | 1.20       | 1.90  | 5.05         | 30.70   | 28.20    | 28.40 |
| 12      | 7.90             | 20.40   | 11.20      | 22.40 | 10.00            | 22.30   | 14.50      | 24.10 | 14.40        | 15.80   | 11.40    | 16.57 |
| 13      | 4.34             | 4.92    | 4.48       | 8.63  | 3.38             | 5.39    | 5.37       | 8.81  | 10.30        | 11.30   | 9.78     | 5.64  |
| 14      | 5.42             | 6.49    | 7.09       | 18.00 | 4.35             | 6.64    | 6.01       | 19.10 | 16.50        | 21.60   | 22.30    | 24.40 |
| 15      | 8.30             | 15.10   | 13.70      | 15.90 | 14.40            | 15.40   | 14.80      | 22.35 | 28.10        | 38.10   | 28.30    | 32.50 |
| 16      | 4.99             | 5.63    | 5.75       | 10.60 | 4.32             | 6.25    | 5.01       | 12.32 | 2.96         | 30.10   | 19.90    | 42.40 |
| 17      | 8.30             | 8.71    | 8.30       | 16.20 | 11.30            | 14.80   | 13.70      | 18.20 | 17.00        | 44.10   | 36.00    | 52.30 |
| 18      | 0.67             | 0.78    | 0.69       | 1.64  | 0.57             | 0.77    | 0.54       | 1.29  | 7.00         | 9.45    | 9.16     | 20.10 |
| 19      | 0.67             | 1.01    | 0.69       | 2.44  | 0.93             | 1.51    | 0.84       | 2.54  | 38.20        | 44.80   | 47.20    | 45.20 |
| 20      | 2.04             | 2.69    | 2.51       | 3.69  | 2.59             | 3.80    | 2.84       | 4.40  | 32.40        | 44.40   | 36.20    | 45.50 |
| Average | 3.43             | 5.72    | 4.22       | 7.93  | 4.01             | 6.52    | 4.98       | 9.18  | 11.14        | 18.30   | 15.54    | 23.19 |

\* and #: Equivalent cytotoxic potential based on perforin expression was detected between the above two kinds of T cells in both negative control and UMC-NPC stimulated groups
